# Supplementary material
Source: PubMed Central journal article supplement (PMC3753886)
Supplement: supp_0022155413492771_10.1369_0022155413492771_Supplemental_Material.pdf [file supp_0022155413492771_10.1369_0022155413492771_Supplemental_Material.pdf]

**Supple. Table 1** Immunohistochemical profiles of the biomarkers and reticulin staining in

HCCs

| Case No. | Size (cm) | HBV | Differentiation | GP73                         | GPC3 | DCP | CD34 | CD31 | Reticulin |
|----------|-----------|-----|-----------------|------------------------------|------|-----|------|------|-----------|
| 1        | 4.5       | +   | well            | Diffuse coarse-block pattern | +    | +   | +    | -    | +         |
| 2        | 1.5       | -   | well            | Diffuse coarse-block pattern | +    | +   | +    | -    | +         |
| 3        | 2.1       | +   | well            | -                            | +    | -   | +    | -    | +         |
| 4        | 10.5      | +   | poor            | Diffuse coarse-block pattern | -    | +   | +    | -    | +         |
| 5        | 2.5       | +   | poor            | Diffuse coarse-block pattern | -    | +   | +    | -    | +         |
| 6        | 4.5       | +   | well            | Diffuse coarse-block pattern | +    | +   | +    | -    | +         |
| 7        | 3         | +   | moderate        | Diffuse coarse-block pattern | +    | -   | +    | -    | +         |
| 8        | 4         | +   | poor            | Diffuse coarse-block pattern | +    | +   | +    | -    | +         |
| 9        | 2         | +   | moderate        | -                            | -    | +   | +    | -    | +         |
| 10       | 1         | +   | well            | Cytoplasmic granular pattern | +    | +   | +    | -    | +         |
| 11       | 3.5       | +   | moderate        | Diffuse coarse-block pattern | +    | -   | +    | -    | +         |
| 12       | 6.5       | +   | moderate        | Diffuse coarse-block pattern | +    | +   | +    | -    | +         |
| 13       | 4         | +   | moderate        | Diffuse coarse-block pattern | +    | +   | +    | -    | +         |
| 14       | 5.5       | +   | poor            | Diffuse coarse-block pattern | +    | +   | +    | -    | +         |
| 15       | 9.5       | +   | poor            | Diffuse coarse-block pattern | +    | +   | +    | -    | +         |

|    |     |   |          |                              |   |   |   |   |   |
|----|-----|---|----------|------------------------------|---|---|---|---|---|
| 16 | 4   | - | moderate | Diffuse coarse-block pattern | + | - | + | - | + |
| 17 | 6   | + | moderate | Diffuse coarse-block pattern | + | + | + | - | + |
| 18 | 4   | + | poor     | Diffuse coarse-block pattern | + | + | + | - | + |
| 19 | 1.8 | + | well     | -                            | + | - | + | - | + |
| 20 | 3.5 | + | moderate | Diffuse coarse-block pattern | + | + | + | - | + |
| 21 | 14  | + | moderate | Diffuse coarse-block pattern | - | + | + | - | + |
| 22 | 9.5 | + | poor     | Diffuse coarse-block pattern | - | - | + | - | + |
| 23 | 1.8 | + | well     | Cytoplasmic granular pattern | + | - | + | - | + |
| 24 | 4.7 | + | poor     | Diffuse coarse-block pattern | - | + | + | - | + |
| 25 | 9.5 | + | moderate | Diffuse coarse-block pattern | + | + | + | - | + |
| 26 | 7   | + | poor     | Diffuse coarse-block pattern | + | + | + | - | + |
| 27 | 7   | + | well     | Cytoplasmic granular pattern | + | + | + | - | + |
| 28 | 2.2 | + | well     | Diffuse coarse-block pattern | + | + | + | - | + |
| 29 | 10  | + | moderate | Diffuse coarse-block pattern | - | - | + | - | + |
| 30 | 10  | + | moderate | Diffuse coarse-block pattern | + | + | + | - | + |
| 31 | 2.5 | + | moderate | Diffuse coarse-block pattern | + | + | + | - | + |
| 32 | 3.8 | + | moderate | Diffuse coarse-block pattern | - | + | + | - | + |
| 33 | 3   | + | poor     | Diffuse coarse-block pattern | - | + | + | - | + |

|    |     |   |          |                              |   |   |            |   |   |
|----|-----|---|----------|------------------------------|---|---|------------|---|---|
|    |     |   |          | pattern                      |   |   |            |   |   |
| 34 | 5.6 | - | well     | Diffuse coarse-block pattern | + | + | +          | - | + |
| 35 | 2.2 | + | well     | Diffuse coarse-block pattern | + | + | +          | - | + |
| 36 | 8.3 | + | moderate | Diffuse coarse-block pattern | - | + | +          | - | + |
| 37 | 2.4 | + | well     | Diffuse coarse-block pattern | + | + | +          | - | + |
| 38 | 3.7 | + | well     | Diffuse coarse-block pattern | + | + | +          | - | + |
| 39 | 4.6 | + | well     | -                            | + | + | +          | - | + |
| 40 | 2.1 | + | well     | Cytoplasmic granular pattern | - | + | Focal<br>+ | - | + |
| 41 | 2.8 | + | well     | Cytoplasmic granular pattern | + | + | +          | - | + |
| 42 | 4.5 | + | well     | Diffuse coarse-block pattern | + | + | +          | - | + |
| 43 | 5.2 | + | well     | Diffuse coarse-block pattern | + | - | +          | - | + |
| 44 | 3.3 | + | well     | Diffuse coarse-block pattern | + | + | +          | - | + |
| 45 | 2.8 | + | well     | Diffuse coarse-block pattern | + | + | +          | - | + |
| 46 | 6.5 | + | well     | -                            | - | - | Focal<br>+ | - | + |
| 47 | 3.5 | + | well     | Diffuse coarse-block pattern | + | + | +          | - | + |
| 48 | 5.5 | + | well     | Cytoplasmic granular pattern | + | + | +          | - | + |
| 49 | 2.2 | + | well     | Diffuse coarse-block pattern | + | + | +          | - | + |
| 50 | 3.7 | - | well     | -                            | - | + | +          | - | + |
| 51 | 4.1 | + | well     | Diffuse coarse-block pattern | + | + | +          | - | + |

|    |     |   |      |                              |   |   |            |   |   |
|----|-----|---|------|------------------------------|---|---|------------|---|---|
|    |     |   |      | pattern                      |   |   |            |   |   |
| 52 | 3.6 | + | well | Diffuse coarse-block pattern | + | - | +          | - | + |
| 53 | 1.7 | + | well | -                            | + | - | Focal<br>+ | - | + |
| 54 | 4.6 | + | well | Diffuse coarse-block pattern | + | + | +          | - | + |
| 55 | 4.2 | + | well | Diffuse coarse-block pattern | + | + | +          | - | + |
| 56 | 5.1 | + | well | Diffuse coarse-block pattern | + | + | +          | - | + |
| 57 | 6.6 | + | well | -                            | - | - | +          | - | + |
| 58 | 3.9 | + | well | Diffuse coarse-block pattern | + | + | +          | - | + |
| 59 | 4.2 | + | well | Diffuse coarse-block pattern | + | + | +          | - | + |
| 60 | 1.3 | + | well | Diffuse coarse-block pattern | + | + | +          | - | + |
| 61 | 5.2 | + | well | Cytoplasmic granular pattern | + | + | +          | - | + |
| 62 | 5.4 | + | well | Diffuse coarse-block pattern | + | + | +          | - | + |
| 63 | 4.8 | - | well | -                            | - | + | +          | - | + |
| 64 | 3.4 | + | well | Diffuse coarse-block pattern | + | + | +          | - | + |
| 65 | 4.5 | + | well | Diffuse coarse-block pattern | + | + | +          | - | + |

HCC: Hepatocellular carcinoma. [All cases were HCV-](#).

**Supple. Table 2** Immunohistochemical profiles of the biomarkers and reticulin staining in nonmalignant neoplastic nodules

| Case No. | Size (cm) |      | HBV | GP73                         | GPC3 | DCP | CD34    | CD31 | Reticulin |
|----------|-----------|------|-----|------------------------------|------|-----|---------|------|-----------|
| 1        | 3.5       | FNH  | +   | Diffuse coarse-block pattern | -    | +   | +       | -    | +         |
| 2        | 1.3       | LGDN | -   | Diffuse coarse-block pattern | +    | +   | +       | -    | -         |
| 3        | 4.0       | LRN  | -   | Cytoplasmic granular pattern | -    | -   | -       | -    | -         |
| 4        | 5.2       | FNH  | -   | Diffuse coarse-block pattern | -    | +   | -       | -    | -         |
| 5        | 3.6       | HGDN | +   | Diffuse coarse-block pattern | +    | -   | Focal + | -    | +         |
| 6        | 1.8       | LRN  | -   | Cytoplasmic granular pattern | -    | +   | -       | -    | -         |
| 7        | 4.1       | LRN  | -   | Cytoplasmic granular pattern | -    | +   | +       | -    | -         |
| 8        | 2.0       | HGDN | +   | Cytoplasmic granular pattern | -    | +   | +       | -    | -         |
| 9        | 4.0       | FNH  | -   | Cytoplasmic granular pattern | +    | -   | -       | -    | -         |
| 10       | 5.5       | LRN  | -   | Cytoplasmic granular pattern | -    | +   | +       | -    | +         |
| 11       | 3.2       | HGDN | +   | Cytoplasmic granular pattern | -    | +   | -       | -    | -         |
| 12       | 2.2       | HGDN | -   | Focal coarse-block pattern   | +    | +   | Focal + | -    | -         |
| 13       | 4.3       | FNH  | +   | Cytoplasmic granular pattern | +    | +   | +       | -    | +         |
| 14       | 3.7       | LRN  | -   | Focal coarse-block pattern   | -    | +   | -       | -    | -         |
| 15       | 3.1       | LCA  | -   | Cytoplasmic granular pattern | -    | -   | Focal + | -    | -         |

|    |      |      |   |                              |   |   |         |   |   |
|----|------|------|---|------------------------------|---|---|---------|---|---|
| 16 | 4.5  | HGDN | + | Focal coarse-block pattern   | - | + | +       | - | + |
| 17 | 1.6  | HGDN | + | Cytoplasmic granular pattern | + | + | +       | - | - |
| 18 | 6.4  | LGDN | - | Cytoplasmic granular pattern | - | + | -       | - | - |
| 19 | 10.5 | FNH  | - | Cytoplasmic granular pattern | - | + | -       | - | - |
| 20 | 10.0 | LRN  | - | -                            | - | + | +       | - | - |
| 21 | 5.5  | FNH  | + | Cytoplasmic granular pattern | - | - | -       | - | - |
| 22 | 6.7  | LCA  | + | Cytoplasmic granular pattern | - | + | -       | - | + |
| 23 | 8.4  | LCA  | - | -                            | - | + | -       | - | - |
| 24 | 9.5  | FNH  | - | Diffuse coarse-block pattern | - | + | +       | - | - |
| 25 | 5.8  | FNH  | - | -                            | - | - | -       | - | - |
| 26 | 6.2  | HGDN | + | Cytoplasmic granular pattern | + | + | +       | - | - |
| 27 | 4.5  | FNH  | - | Cytoplasmic granular pattern | - | + | -       | - | - |
| 28 | 3.4  | LGDN | + | -                            | - | - | Focal + | - | + |
| 29 | 4.8  | FNH  | - | Focal coarse-block pattern   | + | + | -       | - | + |

---

FNH: Focal nodular hyperplasia; LGDN: Low-grade dysplastic nodule; LRN: Large regenerative nodule; HGDN: High-grade dysplastic nodule; LCA: Liver cell adenomas. All cases were HCV-.

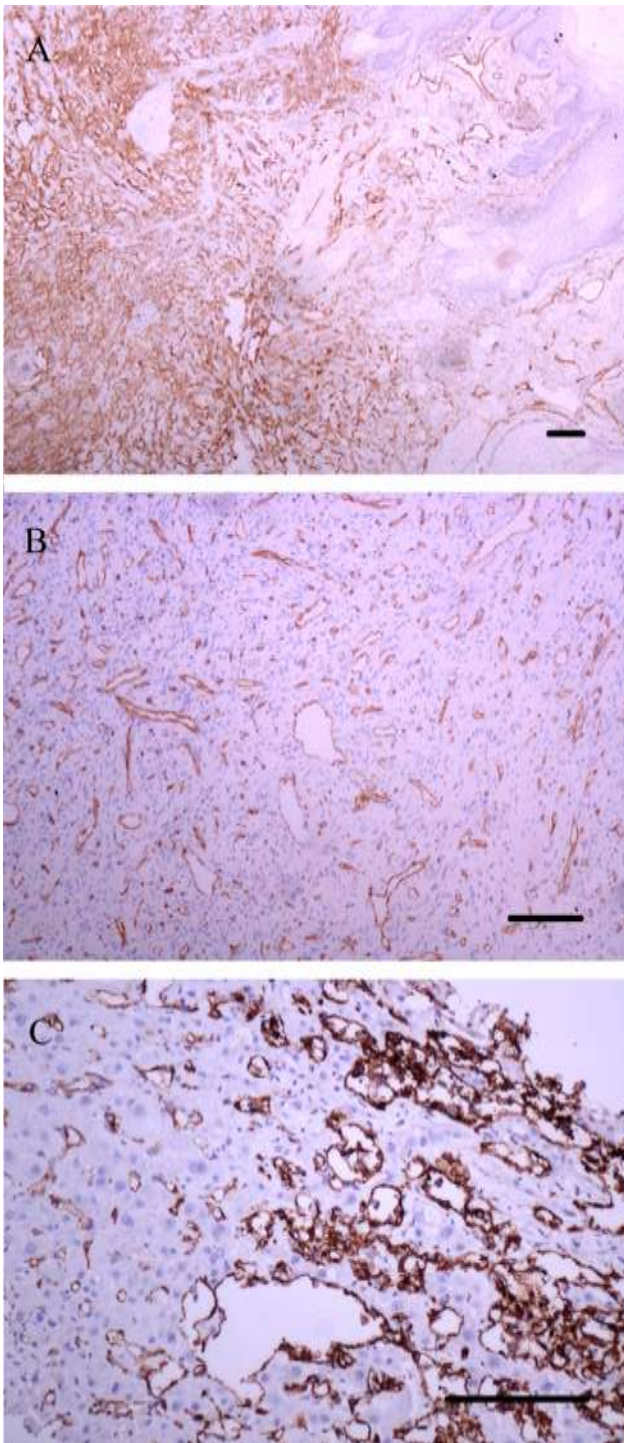

Suppl. Fig. 1 CD31 immunostaining in vascular tumors. (A) Angiosarcoma (scalp). (B) Hemangioma (orbit). (C) Hemangioendothelioma (liver). Bar = 100  $\mu$ m.
